# Supplementary material
Source: publisher figshare collection journal article supplement (https://rs.figshare.com/ndownloader/files/17820131)
Supplement: Supplementary file 1 [file 17820131]

## Sheet: Table.S3
Table S3. PCR and qPCR primers used.
Locus	Primer name	Primer sequence	Purpose
RAD Bv14	Bv14-F	AGTGTCATAACTGAGGTGTCGG	PCR
RAD Bv14	Bv14-R	CATTCCAAATTTCAGCTGCGGA	PCR
RAD Bv27	Bv27-F	GCCTGGTCAATTGTCCACTTTC	PCR
RAD Bv27	Bv27-R	CCTGACAGAGAACGAGAGCTTT	PCR
RAD Bv97	Bv97-F	TGTGTCTGCTGGCAATATCACT	PCR
RAD Bv97	Bv97-R	TCTGTCTGTCCAGATGAACAGC	PCR
ZBTB34	ZBTB34-F4	ATCTCGGTGATCTCGGGCCACTT	PCR
ZBTB34	ZBTB34-R4	GAAACTGCTGCTGTCCATGTC	PCR
ZBTB34	ZBTB34-F6	GGGGCTGAGAACATGTCTGAA	PCR
ZBTB34	ZBTB34-R2	AGTGCCCTTCTTCTTGGAGAC	PCR
TRIM32	TRIM32_F36	GGCGATGTTCAGTAGATAAGCCTG	qPCR
TRIM32	TRIM32_R37	AGGAGCGGAAGGTCCAAGA	qPCR
TOR4A	TOR4A_F7	GTCCTGCCCAAAGACCTCC	qPCR
TOR4A	TOR4A_R7	GCACAAGAGCAAAGCCAAGA	qPCR
DNM1	DNM1_F37	TGGTGTTGATGTCCCCGATG	qPCR
DNM1	DNM1_R37	GAACTGCTGGCGAACCTCT	qPCR
ANGPTL2	ANGTL2_F39	GGCACCCGTCACTTTCTG	qPCR
ANGPTL2	ANGTL2_R39	AATGGCTGTCGTGGGAGT	qPCR
ZBTB43	ZBTB43_F25	GTCAACATACACGGGACGG	qPCR
ZBTB43	ZBTB43_R25	TTGGAGACTGATGGTCGCTG	qPCR
LRRC8A	LRRC8A_F11	GAGGCTGAAGATGGAGTGTGG	qPCR
LRRC8A	LRRC8A_R11	ATCAACAACGAGGGCACCAAG	qPCR
OLFM1	OLFM1_F7	TGATGTGGCTTTGGTATTTGTTGA	qPCR
OLFM1	OLFM1_R7	ACCGCTTTGTTCGGGAGT	qPCR
MECOM	MECOM_F5	AGGAGATTTTGTGAGGGCAAGA	qPCR
MECOM	MECOM_R5	GCTGTTGGAAAGGTAAGACCAG	qPCR
ADARB2	ADARB2_F1	CTGCTGGGAATGCGACTGG	qPCR
ADARB2	ADARB2_R1	GCCTTTCGGAGACTGTGGAG	qPCR
